# Supplementary material for: Anion substitution in hydrogen-bonded organic conductors: the chemical pressure effect on hydrogen-bond-mediated phase transition
Source: Royal Society of Chemistry journal article supplement (doi:10.1039/c6ce01763k), 2016-12-01
Supplement: c6ce01763k1.pdf [file c6ce01763k1.pdf]

## **Electronic Supporting Information**

### **Anion substitution in hydrogen-bonded organic conductors: Chemical pressure effect on hydrogen-bond-mediated phase transition**

Junya Yoshida,<sup>\*[a]</sup> Akira Ueda,<sup>\*[a]</sup> Reiji Kumai,<sup>[b]</sup> Youichi Murakami,<sup>[b]</sup> and Hatsumi Mori<sup>\*[a]</sup>

Email: jyoshida@issp.u-tokyo.ac.jp, a-ueda@issp.u-tokyo.ac.jp hmori@issp.u-tokyo.ac.jp,

<sup>a</sup>The Institute for Solid State Physics, The University of Tokyo, Kashiwa, Chiba 277-8581, Japan.

<sup>b</sup>CMRC and Photon Factory, Institute of Materials Structure Science, High Energy Accelerator Research Organization (KEK), Tsukuba, Ibaraki 305-0801, Japan.

**Table S1** Comparison of crystallographic data for  $\beta'$ -[H<sub>3</sub>(Cat-EDO-TTF)<sub>2</sub>]BF<sub>4</sub> ( $\beta'$ -BF<sub>4</sub>) at 270 K<sup>S1</sup> (high-temperature phase: HTP) and 240 K (HTP) and  $\alpha$ -[H<sub>3</sub>(Cat-EDO-TTF)<sub>2</sub>]BF<sub>4</sub> ( $\alpha$ -BF<sub>4</sub>) at 150 K (low-temperature phase: LTP).<sup>S1</sup> See also Table 2 in the text.

|                                                      | $\beta'$ -BF <sub>4</sub> <sup>S1</sup> (HTP)                                               | $\beta'$ -BF <sub>4</sub> (HTP)                                                             | $\alpha$ -BF <sub>4</sub> <sup>S1</sup> (LTP)                                               |
|------------------------------------------------------|---------------------------------------------------------------------------------------------|---------------------------------------------------------------------------------------------|---------------------------------------------------------------------------------------------|
| <i>T</i> / K                                         | 270                                                                                         | 240                                                                                         | 150                                                                                         |
| Formula                                              | C <sub>24</sub> H <sub>15</sub> O <sub>8</sub> S <sub>8</sub> B <sub>1</sub> F <sub>4</sub> | C <sub>24</sub> H <sub>15</sub> O <sub>8</sub> S <sub>8</sub> B <sub>1</sub> F <sub>4</sub> | C <sub>24</sub> H <sub>15</sub> O <sub>8</sub> S <sub>8</sub> B <sub>1</sub> F <sub>4</sub> |
| Fw                                                   | 774.66                                                                                      | 774.66                                                                                      | 774.66                                                                                      |
| Crystal System                                       | Triclinic                                                                                   | Triclinic                                                                                   | triclinic                                                                                   |
| Space Group                                          | <i>P</i> -1 (#2)                                                                            | <i>P</i> -1 (#2)                                                                            | <i>P</i> -1 (#2)                                                                            |
| <i>a</i> / Å                                         | 7.2409(3)                                                                                   | 7.2244(2)                                                                                   | 7.1203(2)                                                                                   |
| <i>b</i> / Å                                         | 9.7683(5)                                                                                   | 9.7489(3)                                                                                   | 10.9390(4)                                                                                  |
| <i>c</i> / Å                                         | 10.8941(6)                                                                                  | 10.8919(7)                                                                                  | 18.0093(7)                                                                                  |
| $\alpha$ / °                                         | 66.6688(13)                                                                                 | 66.737(1)                                                                                   | 78.1857(8)                                                                                  |
| $\beta$ / °                                          | 85.6578(18)                                                                                 | 85.514(2)                                                                                   | 82.3285(10)                                                                                 |
| $\gamma$ / °                                         | 79.0863(19)                                                                                 | 79.059(2)                                                                                   | 89.7204(11)                                                                                 |
| <i>V</i> / Å <sup>3</sup>                            | 695.62(6)                                                                                   | 691.94(6)                                                                                   | 1358.06(8)                                                                                  |
| <i>Z</i>                                             | 1                                                                                           | 1                                                                                           | 2                                                                                           |
| <i>d</i> <sub>calc</sub> / g·cm <sup>-3</sup>        | 1.849                                                                                       | 1.859                                                                                       | 1.894                                                                                       |
| $\lambda$ / Å                                        | 1.0000                                                                                      | 1.0000                                                                                      | 1.0000                                                                                      |
| $2\theta_{\max}$ / °                                 | 91.4                                                                                        | 74.2                                                                                        | 74.1                                                                                        |
| <i>R</i> <sub>int</sub>                              | 0.0144                                                                                      | 0.0153                                                                                      | 0.0207                                                                                      |
| # of observations                                    | 2452                                                                                        | 1726                                                                                        | 3304                                                                                        |
| # of variables                                       | 232                                                                                         | 236                                                                                         | 473                                                                                         |
| <i>R</i> <sub>1</sub> [ <i>I</i> > 2.0σ( <i>I</i> )] | 0.0435                                                                                      | 0.0381                                                                                      | 0.0330                                                                                      |
| <i>wR</i> <sub>2</sub> (all data)                    | 0.1348                                                                                      | 0.1115                                                                                      | 0.0958                                                                                      |
| GOF                                                  | 1.060                                                                                       | 1.097                                                                                       | 1.048                                                                                       |
| CCDC                                                 | 997839                                                                                      | 1494927                                                                                     | 997837                                                                                      |

**Table S2** Comparison of crystallographic data for  $\beta'$ -[H<sub>3</sub>(Cat-EDO-TTF)<sub>2</sub>]ClO<sub>4</sub> ( $\beta'$ -ClO<sub>4</sub>) at 298 K and 150 K. See also Table 2 in the text.

|                                                      | $\beta'$ -ClO <sub>4</sub>                                       | $\beta'$ -ClO <sub>4</sub>                                       |
|------------------------------------------------------|------------------------------------------------------------------|------------------------------------------------------------------|
| <i>T</i> / K                                         | 298                                                              | 150                                                              |
| Formula                                              | C <sub>24</sub> H <sub>15</sub> ClO <sub>12</sub> S <sub>8</sub> | C <sub>24</sub> H <sub>15</sub> ClO <sub>12</sub> S <sub>8</sub> |
| Fw                                                   | 787.31                                                           | 787.31                                                           |
| Crystal System                                       | triclinic                                                        | triclinic                                                        |
| Space Group                                          | <i>P</i> -1 (#2)                                                 | <i>P</i> -1 (#2)                                                 |
| <i>a</i> / Å                                         | 7.2808(4)                                                        | 7.1809(5)                                                        |
| <i>b</i> / Å                                         | 9.8586(8)                                                        | 9.8084(9)                                                        |
| <i>c</i> / Å                                         | 10.8660(8)                                                       | 10.851(1)                                                        |
| $\alpha$ / °                                         | 66.382(2)                                                        | 66.647(3)                                                        |
| $\beta$ / °                                          | 85.050(3)                                                        | 84.880(3)                                                        |
| $\gamma$ / °                                         | 78.872(3)                                                        | 78.699(3)                                                        |
| <i>V</i> / Å <sup>3</sup>                            | 701.15(9)                                                        | 688.0(1)                                                         |
| <i>Z</i>                                             | 1                                                                | 1                                                                |
| <i>d</i> <sub>calc</sub> / g·cm <sup>-3</sup>        | 1.864                                                            | 1.900                                                            |
| $\lambda$ / Å                                        | 1.0000                                                           | 1.0000                                                           |
| $2\theta_{\max}$ / °                                 | 83.6                                                             | 74.2                                                             |
| <i>R</i> <sub>int</sub>                              | 0.0268                                                           | 0.0305                                                           |
| # of observations                                    | 2159                                                             | 1700                                                             |
| # of variables                                       | 236                                                              | 236                                                              |
| <i>R</i> <sub>1</sub> [ <i>I</i> > 2.0σ( <i>I</i> )] | 0.0455                                                           | 0.0446                                                           |
| <i>wR</i> <sub>2</sub> (all data)                    | 0.1375                                                           | 0.1323                                                           |
| GOF                                                  | 1.097                                                            | 1.104                                                            |
| CCDC                                                 | 1494926                                                          | 1494925                                                          |

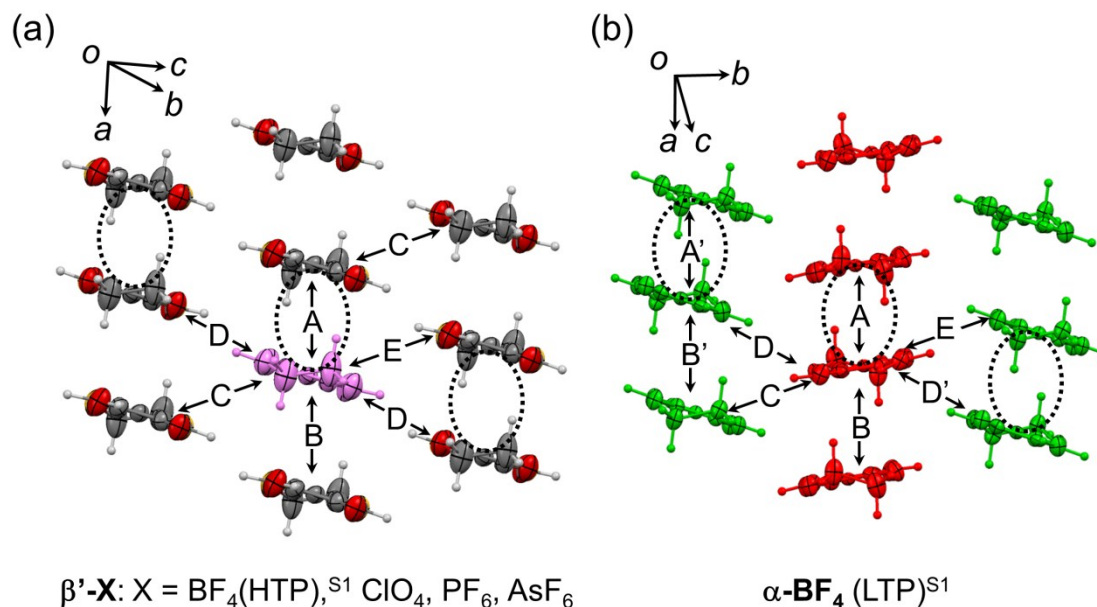

**Fig. S1** Molecular arrangement in the conducting layer of (a)  $\beta'$ -[H<sub>3</sub>(Cat-EDO-TTF)<sub>2</sub>]X ( $\beta'$ -X: X = BF<sub>4</sub> (HTP),<sup>S1</sup> ClO<sub>4</sub>, PF<sub>6</sub>, AsF<sub>6</sub>) and (b)  $\alpha$ -BF<sub>4</sub> (LTP).<sup>S1</sup> Value of the intermolecular transfer integrals (A (A'), B (B'), C, D (D'), and E) are shown in Table S3. Dotted circles represent the  $\pi$ -dimeric pairs.

**Table S3** Comparison of intermolecular transfer integrals (see Fig. S1) of  $\beta'$ -BF<sub>4</sub> at 270 K (HTP)<sup>S1</sup> and 240 K (HTP),  $\alpha$ -BF<sub>4</sub> at 150 K (LTP),<sup>S1</sup> and  $\beta'$ -ClO<sub>4</sub> at 298 K and 150 K, calculated by using the extended Hückel method.<sup>S2</sup>

| Transfer integral | $\beta'$ -BF <sub>4</sub> <sup>S1</sup><br>(270 K) | $\beta'$ -BF <sub>4</sub><br>(240 K) | $\alpha$ -BF <sub>4</sub> <sup>S1</sup><br>(150 K) | $\beta'$ -ClO <sub>4</sub><br>(298 K) | $\beta'$ -ClO <sub>4</sub><br>(150 K) |
|-------------------|----------------------------------------------------|--------------------------------------|----------------------------------------------------|---------------------------------------|---------------------------------------|
| A / meV           | 134                                                | 139                                  | 177 (A)<br>166 (A')                                | 127                                   | 144                                   |
| B / meV           | 4.3                                                | 6.8                                  | 4.0 (B)<br>43.8 (B')                               | 3.0                                   | 3.8                                   |
| C / meV           | 51.0                                               | 52.4                                 | 25.3                                               | 41.0                                  | 51.0                                  |
| D / meV           | 0.7                                                | 0.5                                  | 0.13 (D)<br>6.5 (D')                               | 0.7                                   | 0.6                                   |
| E / meV           | 0.05                                               | 0.08                                 | 0.08                                               | 0.06                                  | 0.11                                  |

**Table S4** Theoretical exchange coupling parameters ( $2J \cdot k_B^{-1}$ ) within the  $\pi$ -dimers (dotted circles in Fig. S1) of  $\beta'$ -**X** ( $X = \text{BF}_4, \text{ClO}_4, \text{PF}_6, \text{AsF}_6$ ) and  $\alpha$ -**BF**<sub>4</sub>, calculated with the equation,  $J \cdot k_B^{-1} = (E_{\text{BS}} - E_{\text{T}}) / (\langle S^2 \rangle_{\text{T}} - \langle S^2 \rangle_{\text{BS}})$ .<sup>S3</sup> The spin expectation values and total energies for the broken-symmetry (BS) singlet ( $\langle S^2 \rangle_{\text{BS}}$  and  $E_{\text{BS}}$ ) and triplet states ( $\langle S^2 \rangle_{\text{T}}$  and  $E_{\text{T}}$ ) were calculated at the UB3LYP/6-31G(d) level of theory<sup>S4</sup> using the molecular geometries taken from the X-ray data.

| Compound                           | $\beta'$ - <b>BF</b> <sub>4</sub> <sup>S1</sup><br>(270 K) | $\beta'$ - <b>ClO</b> <sub>4</sub><br>(298 K) | $\beta'$ - <b>PF</b> <sub>6</sub><br>(270 K) | $\beta'$ - <b>AsF</b> <sub>6</sub><br>(270 K) |
|------------------------------------|------------------------------------------------------------|-----------------------------------------------|----------------------------------------------|-----------------------------------------------|
| $\langle S^2 \rangle_{\text{BS}}$  | 0.7647                                                     | 0.7784                                        | 0.7329                                       | 0.7512                                        |
| $\langle S^2 \rangle_{\text{T}}$   | 2.0317                                                     | 2.0307                                        | 2.0301                                       | 2.0309                                        |
| $E_{\text{BS}}$ / hartree          | -4709.7664                                                 | -4709.7979                                    | -4709.8913                                   | -4709.8871                                    |
| $E_{\text{T}}$ / hartree           | -4709.7627                                                 | -4709.7944                                    | -4709.8872                                   | -4709.8832                                    |
| $E_{\text{BS}} - E_{\text{T}}$ / K | -1170.6                                                    | -1105.2                                       | -1294.7                                      | -1231.5                                       |
| $2J \cdot k_B^{-1}$ / K            | -1847.9                                                    | -1765.1                                       | -1996.1                                      | -1924.7                                       |

  

| Compound                           | $\alpha$ - <b>BF</b> <sub>4</sub> <sup>S1</sup><br>(red dimer,<br>150 K) | $\alpha$ - <b>BF</b> <sub>4</sub> <sup>S1</sup><br>(green dimer,<br>150 K) |
|------------------------------------|--------------------------------------------------------------------------|----------------------------------------------------------------------------|
| $\langle S^2 \rangle_{\text{BS}}$  | 0.72965                                                                  | 0.72956                                                                    |
| $\langle S^2 \rangle_{\text{T}}$   | 2.0340                                                                   | 2.0339                                                                     |
| $E_{\text{BS}}$ / hartree          | -4709.7703                                                               | -4709.7470                                                                 |
| $E_{\text{T}}$ / hartree           | -4709.7658                                                               | -4709.7427                                                                 |
| $E_{\text{BS}} - E_{\text{T}}$ / K | -1395.4                                                                  | -1366.5                                                                    |
| $2J \cdot k_B^{-1}$ / K            | -2139.5                                                                  | -2095.3                                                                    |

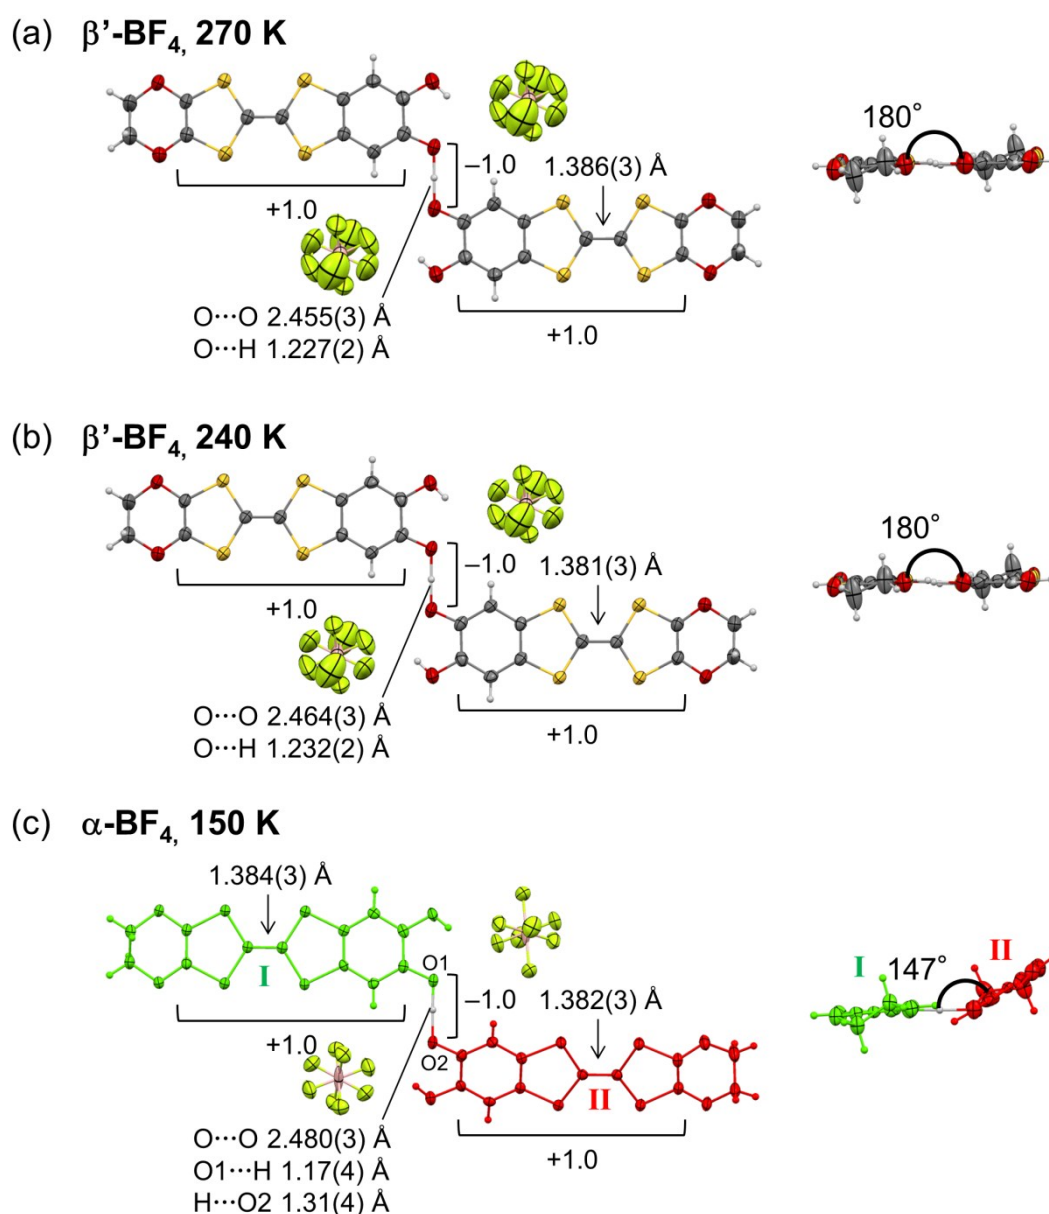

**Fig. S2** X-ray crystal structures of the hydrogen-bonded (H-bonded) molecular unit in (a)  $\beta'$ -BF<sub>4</sub> (270 K, HTP),<sup>S1</sup> (b)  $\beta'$ -BF<sub>4</sub> (240 K, HTP), and (c)  $\alpha$ -BF<sub>4</sub> (150 K, LTP)<sup>S1</sup> (left: top view including the counter anions, right: side view).

The BF<sub>4</sub> anion is positionally and/or thermally disordered in both the HTP and LTP, which means that the anion dynamics is unchanged before and after the phase transition, and thus, this disordering should not participate in the phase transition. We also note that the temperature factors are decreased upon cooling, however, a similar decrease is also observed in  $\beta'$ -ClO<sub>4</sub> without a phase transition (Fig. S3). Therefore, this temperature-factor change is not related to the occurrence of the phase transition.

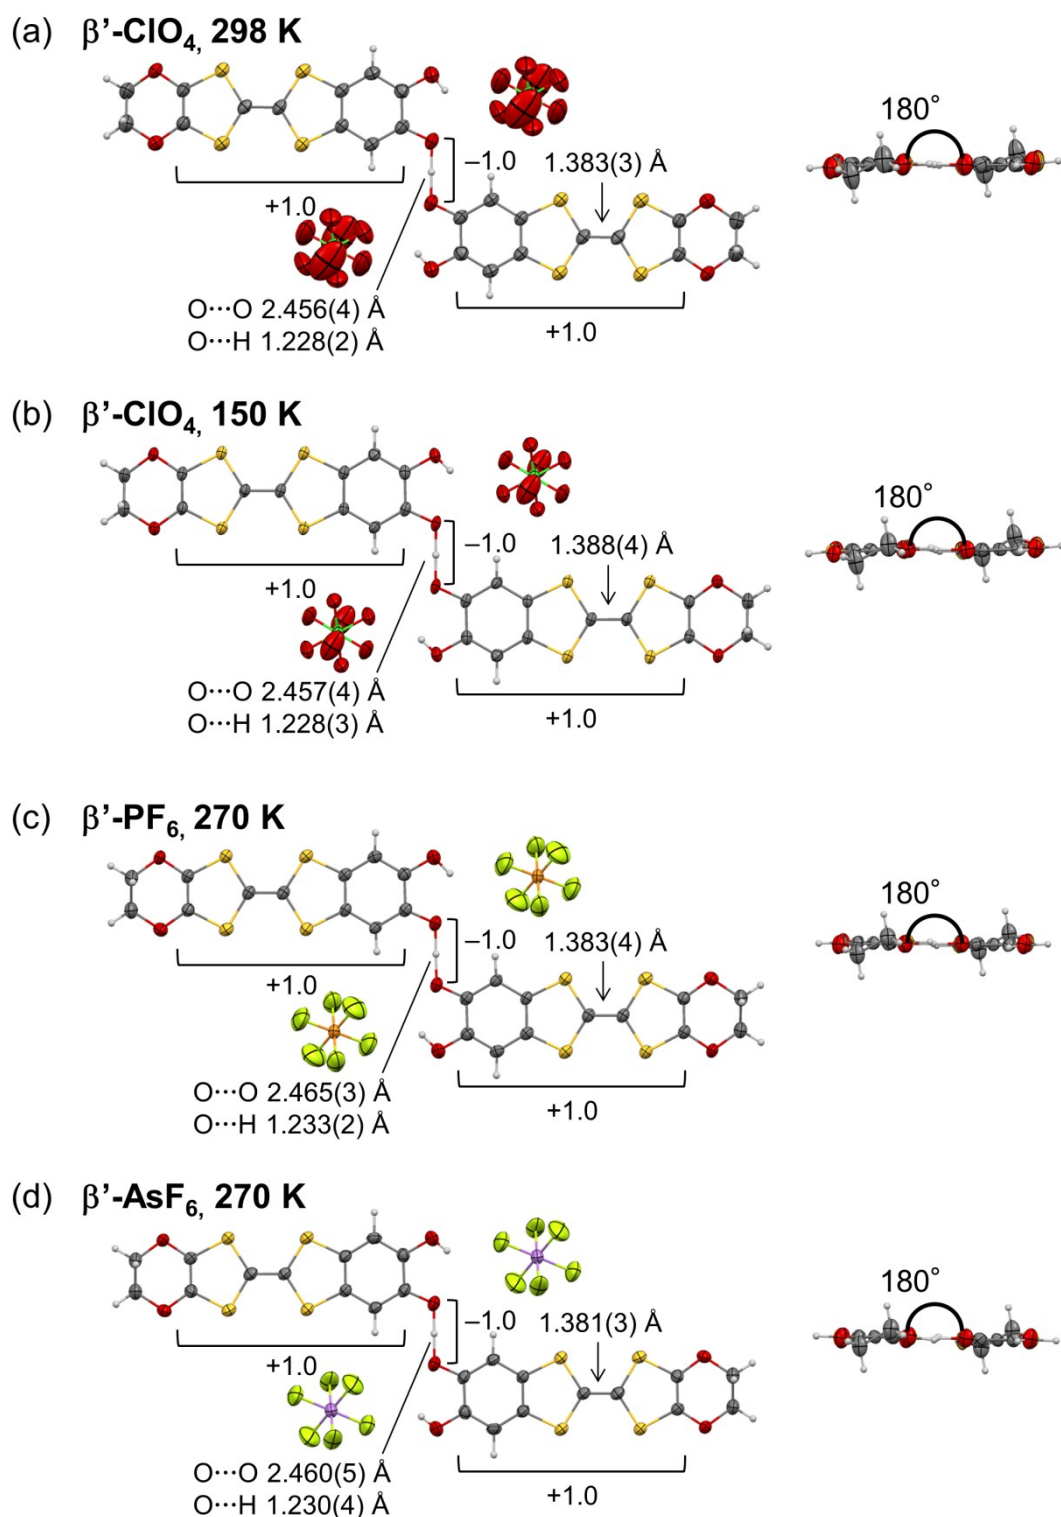

**Fig. S3** Comparison of X-ray crystal structures of the H-bonded molecular unit in (a)  $\beta'$ -ClO<sub>4</sub> (270 K), (b)  $\beta'$ -ClO<sub>4</sub> (150 K), (c)  $\beta'$ -PF<sub>6</sub> (270 K), and (d)  $\beta'$ -AsF<sub>6</sub> (270 K) (left: top view including the counter anions, right: side view). See also Table 2 in the text.

The comparison among (a), (c), and (d) reveals that the H-bond distances ( $\text{O}\cdots\text{O} = 2.456(4) \sim 2.465(3) \text{ \AA}$ ) and the electrical charges on the TTF skeletons (+1, see also Table S4) are not influenced by the anion substitution. Also, the comparison between (a) and (b) shows that  $\beta'$ - $\text{ClO}_4$  also undergoes a decrease in the temperature factors of the disordered counter anion, similar to the case of the  $\text{BF}_4$  salt (Fig. S2).



**Table S5** Charge estimation of the TTF skeleton in  $\beta'$ -BF<sub>4</sub> (270 K,<sup>S1</sup> 240 K: HTP),  $\alpha$ -BF<sub>4</sub> (150 K: LTP),<sup>S1</sup>  $\beta'$ -ClO<sub>4</sub> (298 K, 150 K),  $\beta'$ -PF<sub>6</sub> (270 K), and  $\beta'$ -AsF<sub>6</sub> (270 K), based on its bond lengths ( $a$ ,  $b_1$ ,  $b_2$ ,  $b'_1$ ,  $b'_2$ ,  $c_1$ ,  $c_2$ ,  $c'_1$ ,  $c'_2$ ,  $d$ , and  $d'$ ). The bond numbering scheme is given in Fig. S4. Values of  $\delta$  and  $\delta'$  are defined as  $(b_1+b_2)/2+(c_1+c_2)/2-a-d$  and  $(b'_1+b'_2)/2+(c'_1+c'_2)/2-a-d'$ , respectively. Values of  $Q$ ,  $Q'$ , and  $Q''$  represent the tentative, net, and normalized electrical charges on the TTF skeleton, respectively, calculated with the equations<sup>S1</sup> shown below the Table.

The net charge  $Q'$  for the new compounds is calculated as 0.96(5) (at 298 K) and 0.96(5) (at 150 K) for  $\beta'$ -ClO<sub>4</sub>, 0.95(5) (at 270 K) for  $\beta'$ -PF<sub>6</sub>, and 0.92(6) (at 270 K) for  $\beta'$ -AsF<sub>6</sub>. These values are suggestive of the +1 oxidized state, being consistent with the charge expected from the structural composition (Fig. S2 and S3). The details of the calculation are shown below the Table.

|                        | $\beta'$ -ClO <sub>4</sub><br>(298 K) | $\beta'$ -ClO <sub>4</sub><br>(150 K) | $\beta'$ -PF <sub>6</sub><br>(270 K) | $\beta'$ -AsF <sub>6</sub><br>(270 K) | Neutral<br>Donor <sup>S1</sup><br>(298 K) |
|------------------------|---------------------------------------|---------------------------------------|--------------------------------------|---------------------------------------|-------------------------------------------|
| $a / \text{\AA}$       | 1.383(3)                              | 1.388(4)                              | 1.383(4)                             | 1.387(5)                              | 1.347(8)                                  |
| $b_1 / \text{\AA}$     | 1.729(2)                              | 1.729(3)                              | 1.727(2)                             | 1.724(4)                              | 1.755(3)                                  |
| $b_2 / \text{\AA}$     | 1.715(3)                              | 1.720(4)                              | 1.721(3)                             | 1.720(5)                              | 1.755(3)                                  |
| $b'_1 / \text{\AA}$    | 1.717(3)                              | 1.714(5)                              | 1.724(2)                             | 1.719(4)                              | 1.770(3)                                  |
| $b'_2 / \text{\AA}$    | 1.711(2)                              | 1.730(3)                              | 1.722(3)                             | 1.720(5)                              | 1.770(3)                                  |
| $c_1 / \text{\AA}$     | 1.740(3)                              | 1.737(3)                              | 1.744(3)                             | 1.738(4)                              | 1.760(4)                                  |
| $c_2 / \text{\AA}$     | 1.730(2)                              | 1.741(4)                              | 1.729(2)                             | 1.733(3)                              | 1.760(4)                                  |
| $c'_1 / \text{\AA}$    | 1.722(3)                              | 1.737(4)                              | 1.730(3)                             | 1.727(3)                              | 1.756(4)                                  |
| $c'_2 / \text{\AA}$    | 1.724(3)                              | 1.733(3)                              | 1.719(2)                             | 1.729(4)                              | 1.756(4)                                  |
| $d / \text{\AA}$       | 1.407(4)                              | 1.410(6)                              | 1.408(4)                             | 1.399(7)                              | 1.394(6)                                  |
| $d' / \text{\AA}$      | 1.340(5)                              | 1.338(6)                              | 1.350(4)                             | 1.341(7)                              | 1.315(6)                                  |
| $\delta / \text{\AA}$  | 0.701(6)                              | 0.666(8)                              | 0.699(8)                             | 0.70(1)                               | 0.774(6)                                  |
| $\delta' / \text{\AA}$ | 0.681(6)                              | 0.731(8)                              | 0.686(6)                             | 0.69(1)                               | 0.864(6)                                  |
| $Q^a$                  | 1.19(3)                               | 1.14(4)                               | 1.18(3)                              | 1.16(5)                               | 0.24(3)                                   |
| $Q'^b$                 | 0.96(5)                               | 0.90(5)                               | 0.95(5)                              | 0.92(6)                               | 0                                         |

|                          | $\beta'$ -BF <sub>4</sub> <sup>S1</sup><br>(270 K: HTP) | $\beta'$ -BF <sub>4</sub><br>(240 K: HTP) | $\alpha$ -BF <sub>4</sub> <sup>S1</sup><br>molecule I <sup>d</sup><br>(150 K: LTP) | $\alpha$ -BF <sub>4</sub> <sup>S1</sup><br>molecule II <sup>d</sup><br>(150 K: LTP) |
|--------------------------|---------------------------------------------------------|-------------------------------------------|------------------------------------------------------------------------------------|-------------------------------------------------------------------------------------|
| <i>a</i> / Å             | 1.386(3)                                                | 1.381(3)                                  | 1.384(3)                                                                           | 1.382(3)                                                                            |
| <i>b</i> 1 / Å           | 1.728(2)                                                | 1.718(4)                                  | 1.724(3)                                                                           | 1.728(3)                                                                            |
| <i>b</i> 2 / Å           | 1.714(3)                                                | 1.730(3)                                  | 1.726(3)                                                                           | 1.725(3)                                                                            |
| <i>b</i> '1 / Å          | 1.722(3)                                                | 1.724(3)                                  | 1.723(3)                                                                           | 1.729(3)                                                                            |
| <i>b</i> '2 / Å          | 1.723(2)                                                | 1.722(4)                                  | 1.729(3)                                                                           | 1.724(2)                                                                            |
| <i>c</i> 1 / Å           | 1.740(3)                                                | 1.741(3)                                  | 1.734(3)                                                                           | 1.734(3)                                                                            |
| <i>c</i> 2 / Å           | 1.729(2)                                                | 1.733(3)                                  | 1.744(2)                                                                           | 1.736(3)                                                                            |
| <i>c</i> '1 / Å          | 1.722(3)                                                | 1.733(3)                                  | 1.724(3)                                                                           | 1.728(2)                                                                            |
| <i>c</i> '2 / Å          | 1.731(3)                                                | 1.723(3)                                  | 1.731(2)                                                                           | 1.737(3)                                                                            |
| <i>d</i> / Å             | 1.404(4)                                                | 1.402(5)                                  | 1.411(4)                                                                           | 1.403(5)                                                                            |
| <i>d</i> ' / Å           | 1.338(5)                                                | 1.341(5)                                  | 1.343(5)                                                                           | 1.336(5)                                                                            |
| $\delta$ / Å             | 0.666(6)                                                | 0.678(7)                                  | 0.669(6)                                                                           | 0.677(7)                                                                            |
| $\delta'$ / Å            | 0.725(7)                                                | 0.729(7)                                  | 0.727(7)                                                                           | 0.741(6)                                                                            |
| <i>Q</i> <sup>a</sup>    | 1.16(3)                                                 | 1.10(4)                                   | 1.14(3)                                                                            | 1.06(3)                                                                             |
| <i>Q</i> ' <sup>b</sup>  | 0.92(5)                                                 | 0.86(5)                                   | 0.90(5)                                                                            | 0.82(5)                                                                             |
| <i>Q</i> '' <sup>c</sup> | –                                                       | –                                         | 1.05(7)                                                                            | 0.95(7)                                                                             |

<sup>a</sup>  $Q = 6.347 - 7.463 \cdot (\delta + \delta')/2$ , <sup>b</sup>  $Q' = Q - 0.235$ . <sup>c</sup>  $Q''(\text{molecule I}) = [Q'(\text{molecule I}) / (Q'(\text{molecule I}) + Q'(\text{molecule II}))] \times 2$ ,  $Q''(\text{molecule II}) = [Q'(\text{molecule II}) / (Q'(\text{molecule I}) + Q'(\text{molecule II}))] \times 2$ . <sup>d</sup> molecule I, II are shown in Fig. S2c.

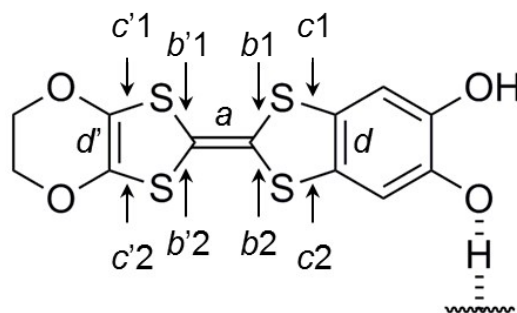

**Fig. S4** Bond numbering scheme for the TTF skeleton.

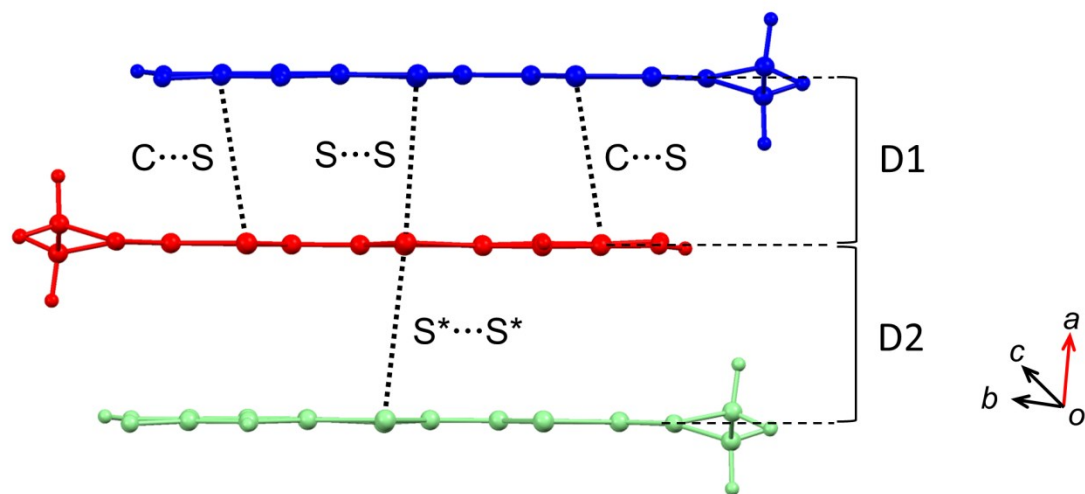

**Fig. S5**  $\pi$ -Stacking column along the  $a$  axis in  $\beta'$ - $\mathbf{X}$  ( $\mathbf{X} = \text{BF}_4,^{\text{S1}} \text{ClO}_4, \text{PF}_6, \text{AsF}_6$ ). Dotted lines represent the intermolecular contacts ( $\text{S}\cdots\text{S}$ ,  $\text{C}\cdots\text{S}$ ,  $\text{S}^*\cdots\text{S}^*$ ). D1 and D2 represent the interplanar distances of the TTF skeletons, corresponding to the interactions A and B in Fig. S1a, respectively. These parameters are not significantly changed by the anion substitution, as shown in Table S6.

**Table S6** Comparison of the intermolecular contacts ( $\text{S}\cdots\text{S}$ ,  $\text{C}\cdots\text{S}$ ,  $\text{S}^*\cdots\text{S}^*$  in Fig. S5) and interplanar distances (D1, D2 in Fig. S5) in  $\beta'$ - $\mathbf{X}$  ( $\mathbf{X} = \text{BF}_4,^{\text{S1}} \text{ClO}_4, \text{PF}_6, \text{AsF}_6$ ).

| $\mathbf{X}$                              | $\text{BF}_4$<br>(270 K) <sup>S1</sup> | $\text{ClO}_4$<br>(298 K) | $\text{PF}_6$<br>(270 K) | $\text{AsF}_6$<br>(270 K) |
|-------------------------------------------|----------------------------------------|---------------------------|--------------------------|---------------------------|
| $\text{S}\cdots\text{S} / \text{\AA}$     | 3.451(1)                               | 3.472(1)                  | 3.461(1)                 | 3.456(2)                  |
| $\text{C}\cdots\text{S} / \text{\AA}$     | 3.473(4)                               | 3.472(4)                  | 3.423(4)                 | 3.407(5)                  |
| $\text{S}^*\cdots\text{S}^* / \text{\AA}$ | 3.813(1)                               | 3.861(1)                  | 3.813(1)                 | 3.792(2)                  |
| D1 / $\text{\AA}$                         | 3.39~3.40                              | 3.39~3.41                 | 3.37~3.41                | 3.36~3.41                 |
| D2 / $\text{\AA}$                         | 3.61~3.62                              | 3.59~3.61                 | 3.53~3.57                | 3.52~3.57                 |

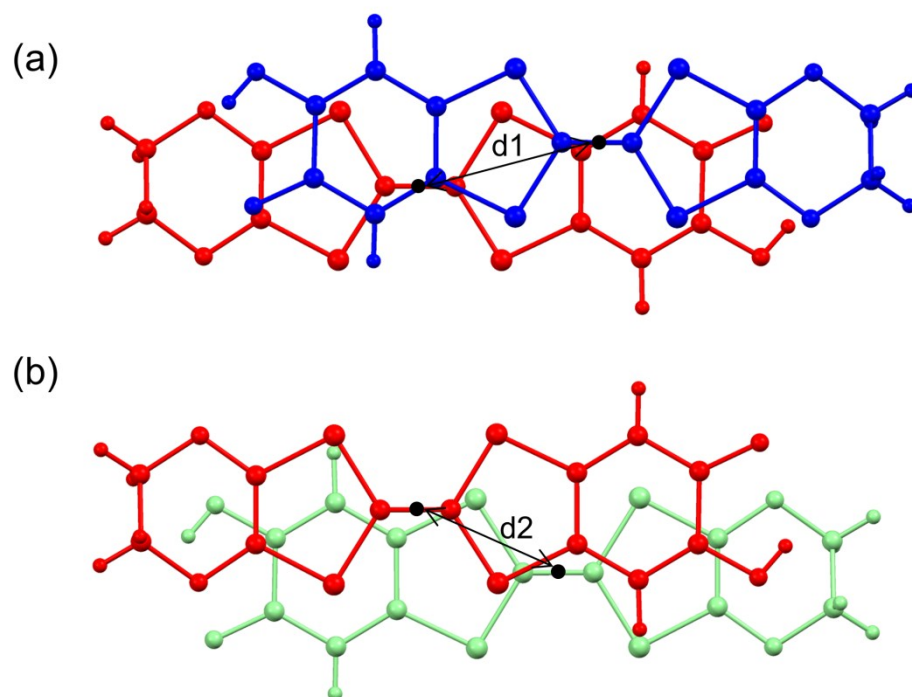

**Fig. S6** Overlapping modes (a) within the  $\pi$ -dimer (the D1 direction in Fig. S5) and (b) between the  $\pi$ -dimers (the D2 direction in Fig. S5) in  $\beta'$ -X (X = BF<sub>4</sub>,<sup>S1</sup> ClO<sub>4</sub>, PF<sub>6</sub>, AsF<sub>6</sub>). Distances of d1 and d2 measured between the centers of the central C=C bond in the TTF skeleton represent the intermolecular distances. These distances are not significantly changed by the anion substitution, as shown in Table S7.

**Table S7** Comparison of intermolecular distances (d1, d2 in Fig. S6) in  $\beta'$ -X (X = BF<sub>4</sub>,<sup>S1</sup> ClO<sub>4</sub>, PF<sub>6</sub>, AsF<sub>6</sub>).

|        | BF <sub>4</sub><br>(270 K) <sup>S1</sup> | ClO <sub>4</sub><br>(298 K) | PF <sub>6</sub><br>(270 K) | AsF <sub>6</sub><br>(270 K) |
|--------|------------------------------------------|-----------------------------|----------------------------|-----------------------------|
| d1 / Å | 3.41                                     | 3.42                        | 3.41                       | 3.40                        |
| d2 / Å | 3.60                                     | 3.58                        | 3.54                       | 3.53                        |

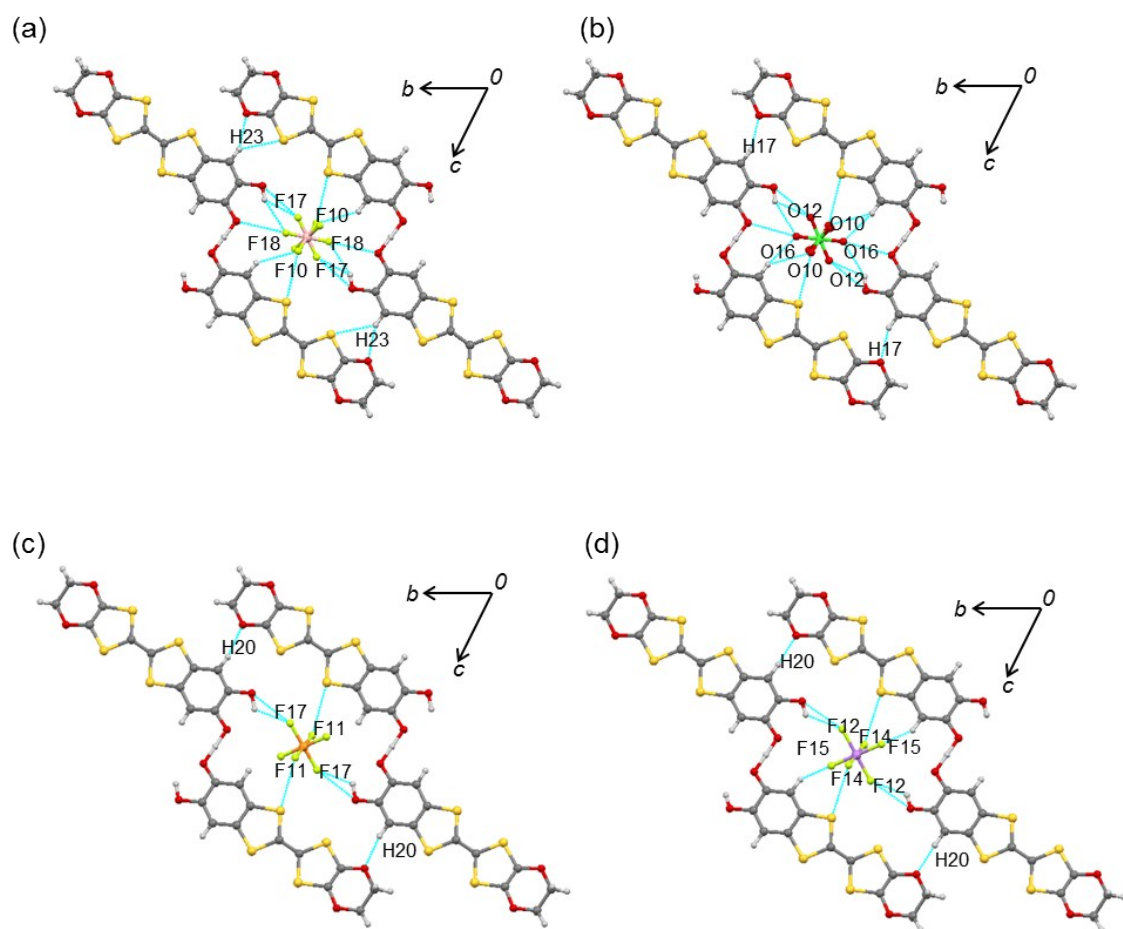

**Fig. S7** Crystal packing structures around the counter anion in  $\beta'$ - $\text{X}$  ( $\text{X} =$  (a)  $\text{BF}_4^-$  (270 K),<sup>S1</sup> (b)  $\text{ClO}_4^-$  (298 K), (c)  $\text{PF}_6^-$  (270 K), (d)  $\text{AsF}_6^-$  (270 K)) in the  $bc$  plane. Blue lines represent the interatomic contacts shorter than the sum of van der Waals (vdW) radii.

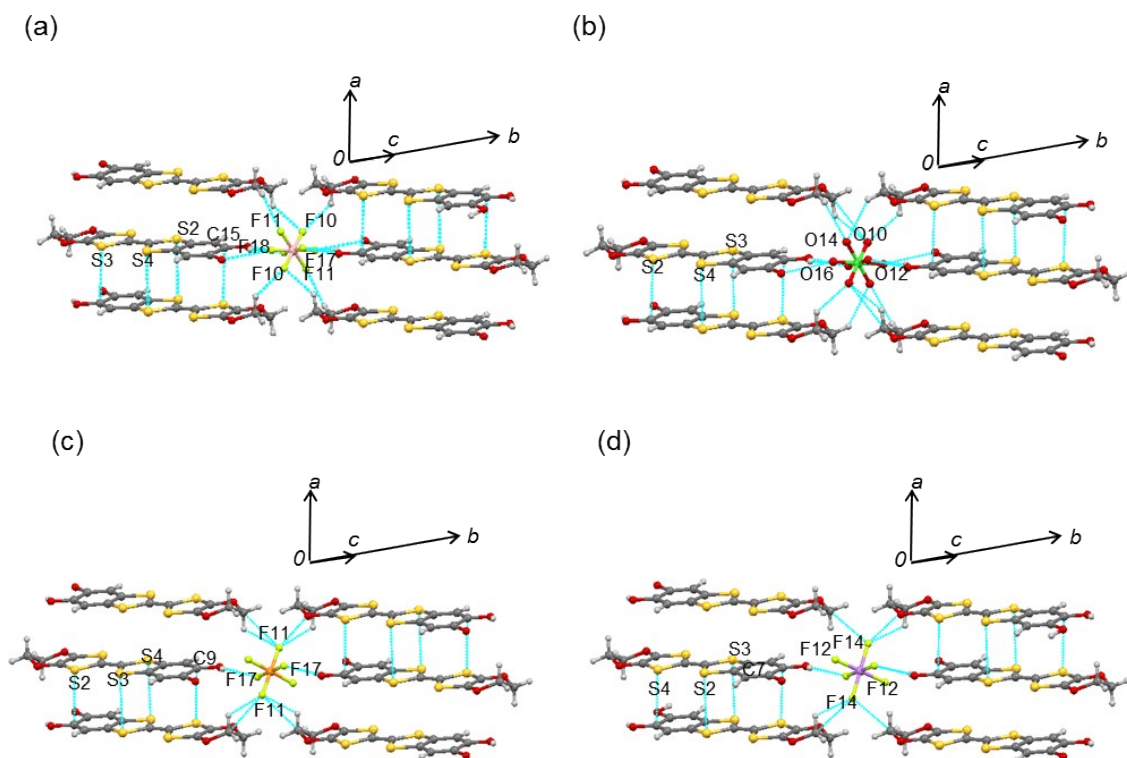

**Fig. S8** Crystal packing structures around the counter anion in  $\beta'$ -**X** (**X** = (a)  $\text{BF}_4$  (270 K),<sup>S1</sup> (b)  $\text{ClO}_4$  (298 K), (c)  $\text{PF}_6$  (270 K), (d)  $\text{AsF}_6$  (270 K)). Blue lines represent the interatomic contacts shorter than the sum of vdW radii.

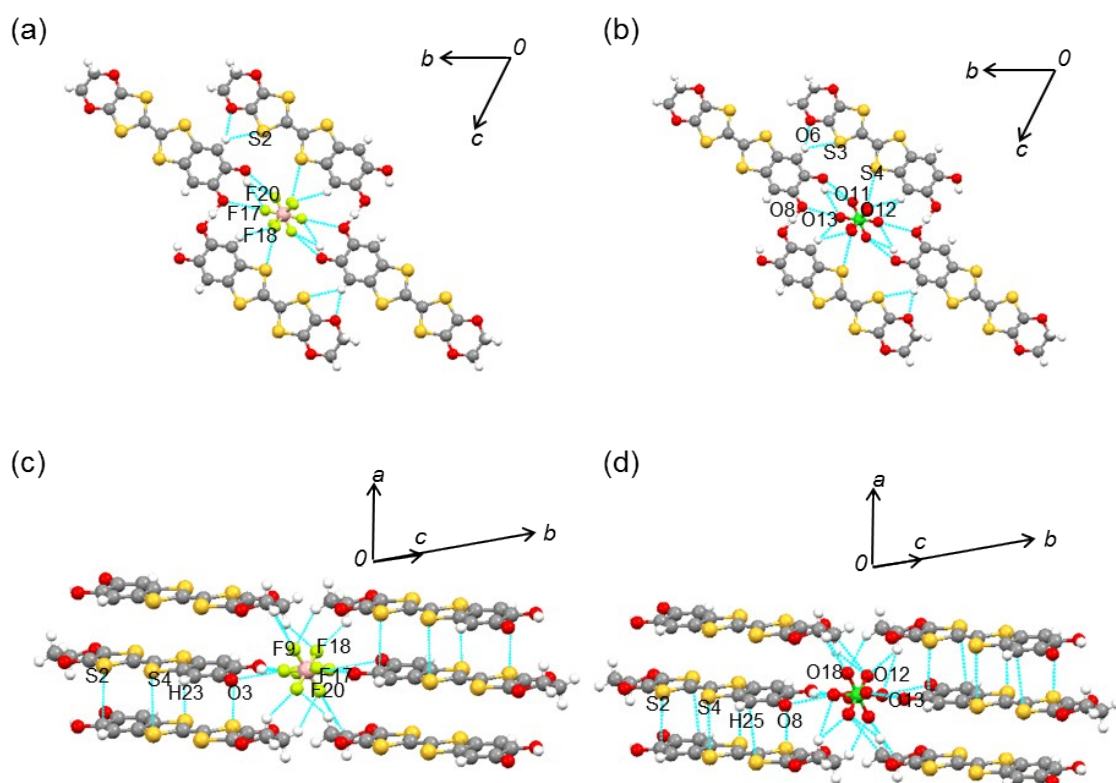

**Fig. S9** Crystal packing structures around the counter anion in the  $bc$  plane of (a)  $\beta'$ - $\text{BF}_4$  (240 K) and (b)  $\beta'$ - $\text{ClO}_4$  (150 K), and along the  $a$ -axis of (c)  $\beta'$ - $\text{BF}_4$  (240 K) and (d)  $\beta'$ - $\text{ClO}_4$  (150 K). Blue lines represent the interatomic contacts shorter than the sum of vdW radii.

The interatomic contacts including H-bonding interactions contract anisotropically with decreasing temperature. The contacts along the  $b$ -axis contract, whereas that along the  $c$ -axis has no change. As for  $\beta'$ - $\text{BF}_4$  [ $\beta'$ - $\text{ClO}_4$ ], the contacts (F17---O25) and (F18---O25) [(F17---O25) and (F18---O25)] change from 2.764(7) Å and 2.982(7) Å [2.766(7) Å and 2.961(8) Å] at 270 K [298 K] (Fig. S7 and S8, Table S8) to 2.757(7) Å and 2.966(7) Å [2.758(6) Å and 2.903(8) Å] at 240 K [150 K], while the contact (F10---S4) [(O10---S4)] has no change from 3.126(6) Å [3.126(8) Å] at 270 K [298 K] to 3.126(6) Å [3.126(8) Å] at 240 K [150 K], which is good agreement with the anisotropic chemical pressure along the  $b$ -axis.



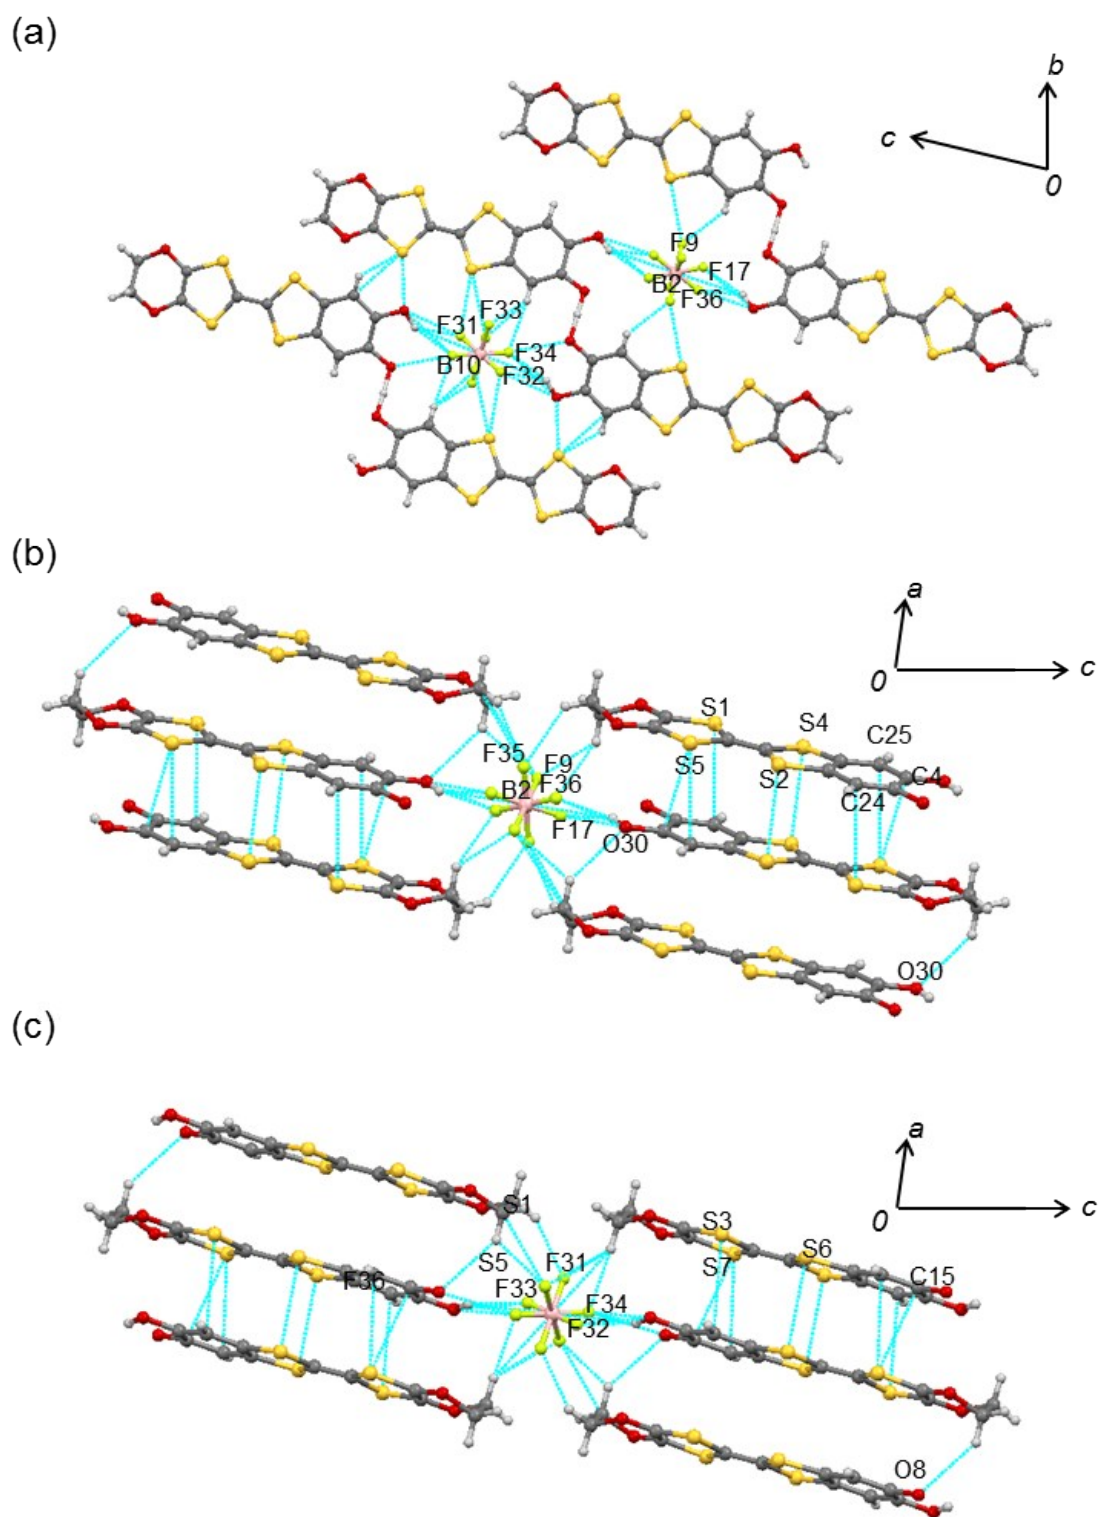

**Fig. S10** Crystal packing structures around the  $\text{BF}_4$  anion in  $\alpha\text{-BF}_4$  (150 K),<sup>S1</sup> (a) in the  $bc$  plane and (b), (c) along the  $b$ -axis. Blue lines represent the interatomic contacts shorter than the sum of vdW radii.



**Table S8** Comparison of intermolecular distances (Fig. S7-S10) in  $\beta'$ -**X** (**X** = BF<sub>4</sub>,<sup>S1</sup> ClO<sub>4</sub>, PF<sub>6</sub>, AsF<sub>6</sub>) and  $\alpha$ -BF<sub>4</sub>.

| $\beta'$ -[H <sub>3</sub> (Cat-EDO-TTF) <sub>2</sub> ]BF <sub>4</sub> (270 K) <sup>S1</sup> |                       |                     |                                     |
|---------------------------------------------------------------------------------------------|-----------------------|---------------------|-------------------------------------|
|                                                                                             | $d$ [(F / O)...H] / Å | $d$ [H-(O / C)] / Å | $\angle$ [(F / O)...H-(O / C)] / °  |
| F17...H22-O25                                                                               | 2.19(3)               | 0.82(3)             | 127(4)                              |
| F18...H22-O25                                                                               | 2.28(3)               | 0.82(3)             | 154(4)                              |
| F10...H21-C16                                                                               | 2.54(4)               | 0.90(4)             | 142(2)                              |
| F10...H7B-C7                                                                                | 2.528(6)              | 0.970(6)            | 136.4(2)                            |
| F10...H8A-C8                                                                                | 2.432(6)              | 0.970(6)            | 133.9(3)                            |
| F11...H7A-C7                                                                                | 2.41(1)               | 0.970(5)            | 138.8(5)                            |
| O14...H23-C15                                                                               | 2.64(4)               | 0.94(4)             | 150(3)                              |
|                                                                                             | $d$ / Å               |                     |                                     |
| F10...S4                                                                                    | 3.126(6)              |                     |                                     |
| F17...O25                                                                                   | 2.764(7)              |                     |                                     |
| F18...O2                                                                                    | 2.982(7)              |                     |                                     |
| S3...H23                                                                                    | 2.96(4)               |                     |                                     |
| S3...C15                                                                                    | 3.557(4)              |                     |                                     |
| S2...S4                                                                                     | 3.451(2)              |                     |                                     |
| $\beta'$ -[H <sub>3</sub> (Cat-EDO-TTF) <sub>2</sub> ]BF <sub>4</sub> (240 K)               |                       |                     |                                     |
|                                                                                             | $d$ [(F / O)...H] / Å | $d$ [H-(O / C)] / Å | $\angle$ [(F / O)...H-(O or C)] / ° |
| F20...H21-O4                                                                                | 2.17(3)               | 0.83(4)             | 128(4)                              |
| F17...H21-O4                                                                                | 2.25(3)               | 0.83(4)             | 155(4)                              |
| F18...H23-C15                                                                               | 2.53(4)               | 0.88(4)             | 143(2)                              |
| F18...H6B-C6                                                                                | 2.436(6)              | 0.970(7)            | 134.8(3)                            |
| F9...H10A-C10                                                                               | 2.368(9)              | 0.970(5)            | 138.2(5)                            |
| F9...H6A-C6                                                                                 | 2.60(1)               | 0.970(6)            | 145.7(4)                            |
| F18...H10B-C10                                                                              | 2.532(6)              | 0.970(6)            | 136.2(2)                            |
| O13...H22-C16                                                                               | 2.70(4)               | 0.91(4)             | 144(2)                              |
|                                                                                             | $d$ / Å               |                     |                                     |
| F10...S4                                                                                    | 3.107(6)              |                     |                                     |
| F17...O3                                                                                    | 2.966(7)              |                     |                                     |
| F20...O4                                                                                    | 2.757(6)              |                     |                                     |
| S2...H22                                                                                    | 2.98(4)               |                     |                                     |
| S2...C7                                                                                     | 3.467(4)              |                     |                                     |
| F9...C10                                                                                    | 3.16(1)               |                     |                                     |

S1...S4                    3.441(1)

| $\alpha$ -[H <sub>3</sub> (Cat-EDO-TTF) <sub>2</sub> ]BF <sub>4</sub> (150 K) <sup>S1</sup> |                       |                     |                                    |
|---------------------------------------------------------------------------------------------|-----------------------|---------------------|------------------------------------|
|                                                                                             | $d$ [(F / O)...H] / Å | $d$ [H-(O / C)] / Å | $\angle$ [(F / O)...H-(O / C)] / ° |
| F17...H40-O30                                                                               | 2.17(4)               | 0.82(4)             | 153(3)                             |
| F36...H40-O30                                                                               | 2.06(4)               | 0.82(4)             | 135(3)                             |
| F9...H38-C27                                                                                | 2.59(3)               | 0.84(4)             | 133(3)                             |
| F35...H5A-C5                                                                                | 2.633(6)              | 0.970(6)            | 125.1(4)                           |
| F35...H5B-C5                                                                                | 2.769(6)              | 0.970(6)            | 107.1(3)                           |
| F35...H1A-C1                                                                                | 3.210(6)              | 0.970(5)            | 109.2(4)                           |
| F33...H42-C24                                                                               | 2.59(3)               | 0.89(3)             | 137(3)                             |
| F31...H42-C24                                                                               | 2.53(2)               | 0.89(3)             | 136(2)                             |
| F34...H42-C24                                                                               | 2.50(3)               | 0.89(3)             | 173(3)                             |
| F32...H39-O5                                                                                | 2.10(4)               | 0.92(5)             | 133(3)                             |
| F9...H1B-C1                                                                                 | 2.555(5)              | 0.970(5)            | 130.5(3)                           |
| F36...H1B-C1                                                                                | 2.582(6)              | 0.970(5)            | 140.6(3)                           |
| O30...H58-C5                                                                                | 2.657(4)              | 0.970(5)            | 145.2(3)                           |
| F31...H7A-C7                                                                                | 2.370(5)              | 0.970(4)            | 139.7(4)                           |
| F31...H7B-C7                                                                                | 2.660(5)              | 0.970(6)            | 123.0(4)                           |
| F33...H11B-C1<br>1                                                                          | 2.466(5)              | 0.970(6)            | 119.2(3)                           |
| F34...H7B-C7                                                                                | 2.538(7)              | 0.970(7)            | 154.8(4)                           |
| F11...H7A-C7                                                                                | 2.695(4)              | 0.970(7)            | 145.6(3)                           |
| O8...H11B-C11                                                                               | 2.695(4)              | 0.970(7)            | 145.6(3)                           |
| $d$ / Å                                                                                     |                       |                     |                                    |
| F9...S6                                                                                     | 3.162(4)              |                     |                                    |
| F17...O30                                                                                   | 2.917(5)              |                     |                                    |
| F36...O30                                                                                   | 2.693(4)              |                     |                                    |
| F31...S2                                                                                    | 3.124(4)              |                     |                                    |
| F34...O8                                                                                    | 2.827(4)              |                     |                                    |
| F32...O5                                                                                    | 2.811(5)              |                     |                                    |
| F32...S2                                                                                    | 3.198(5)              |                     |                                    |
| S5...O5                                                                                     | 3.252(3)              |                     |                                    |
| S5...H37                                                                                    | 2.96(3)               |                     |                                    |
| S5...C26                                                                                    | 3.359(3)              |                     |                                    |
| F35...C5                                                                                    | 3.192(6)              |                     |                                    |
| F35...C1                                                                                    | 3.112(6)              |                     |                                    |

|           |          |
|-----------|----------|
| S5...C4   | 3.468(3) |
| S5...C25  | 3.466(3) |
| S1...C24  | 3.472(3) |
| S2...S4   | 3.384(2) |
| F33...C11 | 3.059(6) |
| F3...C26  | 3.672(3) |
| S6...S8   | 3.788(2) |
| S7...C27  | 3.734(4) |
| S7...C15  | 3.374(3) |

$\beta'$ -[H<sub>3</sub>(Cat-EDO-TTF)<sub>2</sub>]ClO<sub>4</sub> (298 K)

|               | $d$ [O...H] / Å | $d$ [H-(O / C)] / Å | $\angle$ [O...H-(O / C)] / ° |
|---------------|-----------------|---------------------|------------------------------|
| O12...H20-O3  | 2.26(4)         | 0.81(4)             | 120(4)                       |
| O16...H20-O3  | 2.37(4)         | 0.81(4)             | 152(5)                       |
| O10...H18-C15 | 2.60(5)         | 0.93(4)             | 139(3)                       |
| O10...H9B-C9  | 2.561(9)        | 0.970(7)            | 132.3(4)                     |
| O10...H3B-C3  | 2.486(8)        | 0.970(7)            | 128.5(4)                     |
| O14...H9A-C9  | 2.47(2)         | 0.970(5)            | 136.7(5)                     |
| O14...H3A-C3  | 2.69(2)         | 0.970(6)            | 141.7(6)                     |
| O1...H17-O13  | 2.61(5)         | 0.98(5)             | 146(3)                       |

$d$  / Å

|          |          |
|----------|----------|
| O10...S4 | 3.126(8) |
| O12...O3 | 2.766(7) |
| O16...O5 | 2.961(8) |
| O10...C3 | 3.182(9) |
| S3...S4  | 3.472(2) |
| S2...C6  | 3.472(4) |

$\beta'$ -[H<sub>3</sub>(Cat-EDO-TTF)<sub>2</sub>]ClO<sub>4</sub> (150 K)

|                | $d$ [O...H] / Å | $d$ [H-(O / C)] / Å | $\angle$ [O...H-(O / C)] / ° |
|----------------|-----------------|---------------------|------------------------------|
| O11...H9-O9    | 2.20(4)         | 0.83(4)             | 125(5)                       |
| O13...H9-O9    | 2.29(4)         | 0.83(4)             | 159(6)                       |
| O13...H25-C25  | 2.63(6)         | 0.93(5)             | 167(4)                       |
| O10...H14B-C14 | 2.55(5)         | 0.970(6)            | 141(4)                       |
| O10...H20B-C20 | 2.37(4)         | 0.970(4)            | 134(4)                       |
| O12...H20A-C20 | 2.521(7)        | 0.970(6)            | 130(4)                       |
| O12...H14A-C14 | 2.42(4)         | 0.97(5)             | 128(4)                       |

|                |          |         |        |
|----------------|----------|---------|--------|
| O13...H20A-O20 | 2.903(8) | 0.97(5) | 160(5) |
| O12...H25-C25  | 2.52(5)  | 0.93(5) | 140(3) |
| O6...H22-O22   | 2.95(5)  | 1.00(5) | 144(3) |

---

*d* / Å

---

|           |          |
|-----------|----------|
| O12...S4  | 3.165(7) |
| O11...O9  | 2.758(6) |
| O13...O8  | 2.903(8) |
| S2...S4   | 3.422(2) |
| S3...C17  | 3.433(5) |
| S3...H22  | 2.95(9)  |
| O10...C20 | 3.12(1)  |
| O12...C14 | 3.114(8) |
| S5...C25  | 3.481(5) |

---



---

$\beta'$ -[H<sub>3</sub>(Cat-EDO-TTF)<sub>2</sub>]PF<sub>6</sub> (270 K)

|                | <i>d</i> [(F / O)...H] / Å | <i>d</i> [H-(O / C)] / Å | ∠[(F / O)...H-(O / C)] / ° |
|----------------|----------------------------|--------------------------|----------------------------|
| F17...H22-O3   | 2.24(4)                    | 0.93(4)                  | 122(4)                     |
| F11...H13B-C13 | 2.632(4)                   | 0.970(5)                 | 112.5(3)                   |
| F11...H12B-C12 | 2.531(5)                   | 0.970(6)                 | 119.3(3)                   |
| O16...H20-C19  | 2.49(4)                    | 0.94(5)                  | 158(3)                     |

---

*d* / Å

---

|           |          |
|-----------|----------|
| F11...S3  | 3.162(4) |
| F17...O3  | 2.842(3) |
| F11...C12 | 3.122(5) |
| F11...C13 | 3.135(5) |
| S2...D9   | 3.423(3) |
| S3...S4   | 3.461(2) |

---



---

$\beta'$ -[H<sub>3</sub>(Cat-EDO-TTF)<sub>2</sub>]AsF<sub>6</sub> (270 K)

|                | <i>d</i> [(F / O)...H] / Å | <i>d</i> [H-(O / C)] / Å | ∠[F...H-(O / C)] / ° |
|----------------|----------------------------|--------------------------|----------------------|
| F12...H22-O18  | 2.29(6)                    | 0.79(5)                  | 128(6)               |
| F14...H13A-C13 | 2.563(4)                   | 0.970(7)                 | 115.2(3)             |
| O16...H20-C19  | 2.49(4)                    | 0.94(5)                  | 158(3)               |

---

*d* / Å

---

|           |          |
|-----------|----------|
| F14...S2  | 3.18(5)  |
| F12...O18 | 2.850(4) |

|           |          |
|-----------|----------|
| F14...C13 | 3.102(7) |
| F14...C11 | 3.113(6) |
| S4...C7   | 3.407(5) |
| S2...S3   | 3.456(2) |

---

## Reference

- [S1] J. Yoshida, A. Ueda, A. Nakao, R. Kumai, H. Nakao, Y. Murakami, H. Mori, *Chem. Commun.* **2014**, *50*, 15557–15560.
- [S2] T. Mori, A. Kobayashi, Y. Sasaki, H. Kobayashi, G. Saito, H. Inokuchi, *Bull. Chem. Soc. Jpn.* **1984**, *57*, 627–633.
- [S3] S. Yamanaka, T. Kawakami, H. Nagao, K. Yamaguchi, *Chem. Phys. Lett.* **1994**, *231*, 25–33.
- [S4] M. J. Frisch, G. W. Trucks, H. B. Schlegel, G. E. Scuseria, M. A. Robb, J. R. Cheeseman, J. A. Montgomery, T. Vreven, K. N. Kudin, J. C. Burant, J. M. Millam, S. S. Iyengar, J. Tomasi, V. Barone, B. Mennucci, M. Cossi, G. Scalmani, N. Rega, G. A. Petersson, H. Nakatsuji, M. Hada, M. Ehara, K. Toyota, R. Fukuda, J. Hasegawa, M. Ishida, T. Nakajima, Y. Honda, O. Kitao, H. Nakai, M. Klene, X. Li, J. E. Knox, H. P. Hratchian, J. B. Cross, V. Bakken, C. Adamo, J. Jaramillo, R. Gomperts, R. E. Stratmann, O. Yazyev, A. J. Austin, R. Cammi, C. Pomelli, J. W. Ochterski, P. Y. Ayala, K. Morokuma, G. A. Voth, P. Salvador, J. J. Dannenberg, V. G. Zakrzewski, S. Dapprich, A. D. Daniels, M. C. Strain, O. Farkas, D. K. Malick, A. D. Rabuck, K. Raghavachari, J. B. Foresman, J. V. Ortiz, Q. Cui, A. G. Baboul, S. Clifford, J. Cioslowski, B. B. Stefanov, G. Liu, A. Liashenko, P. Piskorz, I. Komaromi, R. L. Martin, D. J. Fox, T. Keith, M. A. Al-Laham, C. Y. Peng, A. Nanayakkara, M. Challacombe, P. M. W. Gill, B. Johnson, W. Chen, M. W. Wong, C. Gonzalez, J. A. Pople, Gaussian, Inc., Wallingford CT, **2004**.
